# Supplementary material for: Association of ketamine use with lower risks of post-intubation hypotension in hemodynamically-unstable patients in the emergency department
Source: PubMed Central journal article supplement (PMC6872717; doi:10.1038/s41598-019-53360-6), 2019-11-21
Supplement: 41598_2019_53360_MOESM1_ESM.pdf [file 41598_2019_53360_MOESM1_ESM.pdf]

**Supplemental Table 1. Baseline characteristics of the original and propensity score-matched cohorts**

| Variables                            | Original cohort           |                            |                          | PS matched cohort         |                            |                          |
|--------------------------------------|---------------------------|----------------------------|--------------------------|---------------------------|----------------------------|--------------------------|
|                                      | Ketamine group<br>(n=316) | Reference group<br>(n=661) | Standardized differences | Ketamine group<br>(n=286) | Reference group<br>(n=286) | Standardized differences |
| Age, mean (SD), years                | 65.6 (17.0)               | 63.7 (17.7)                |                          | 64.5 (16.1)               | 63.8 (18.1)                |                          |
| Female sex (%)                       | 209 (66.1)                | 460 (69.6)                 | 7.4                      | 65.8 (17.0)               | 65.0 (16.5)                | 1.3                      |
| Body mass index (kg/m <sup>2</sup> ) |                           |                            |                          |                           |                            |                          |
| <18.5                                | 63 (19.9)                 | 111 (16.8)                 | 8.0                      | 49 (17.1)                 | 48 (16.8)                  | 0.8                      |
| 18.5-24.9                            | 169 (53.5)                | 398 (60.2)                 | 13.6                     | 165 (57.7)                | 167 (58.4)                 | 1.4                      |
| ≥25.0                                | 84 (26.7)                 | 152 (23.0)                 | 8.5                      | 72 (25.2)                 | 71 (24.8)                  | 0.9                      |
| Primary indication (%)               |                           |                            |                          |                           |                            |                          |
| Respiratory failure                  | 75 (23.7)                 | 246 (37.2)                 | 29.7                     | 75 (26.2)                 | 73 (25.5)                  | 1.6                      |
| Medical shock                        | 166 (52.5)                | 144 (21.8)                 | 67.0                     | 136 (47.6)                | 134 (46.9)                 | 1.4                      |
| Traumatic indication                 | 40 (12.9)                 | 98 (14.8)                  | 55.0                     | 40 (14.0)                 | 45 (15.7)                  | 4.8                      |
| Others*                              | 35 (11.1)                 | 173 (26.2)                 | 39.5                     | 35 (12.2)                 | 34 (11.9)                  | 0.9                      |
| Pretreatment use                     | 216 (32.7)                | 445 (67.3)                 | 73.8                     | 99 (34.6)                 | 92 (32.2)                  | 5.1                      |
| Neuromuscular blocker use†           | 254 (80.4)                | 487 (73.7)                 | 16.0                     | 226 (79.0)                | 226 (79.0)                 | 0                        |
| Intubator's specialty                |                           |                            |                          |                           |                            |                          |
| Transitional-year resident‡          | 92 (29.1)                 | 244 (36.9)                 | 16.6                     | 90 (31.5)                 | 91 (31.8)                  | 6.5                      |
| Emergency medicine resident          | 136 (43.0)                | 224 (33.9)                 | 18.8                     | 114 (39.9)                | 119 (41.6)                 | 3.5                      |
| Emergency physician                  | 51 (16.1)                 | 121 (18.3)                 | 5.8                      | 50 (17.5)                 | 49 (17.1)                  | 1.1                      |
| Other specialties                    | 37 (11.7)                 | 72 (10.9)                  | 22.6                     | 32 (11.2)                 | 27 (9.4)                   | 5.9                      |
| Outcome Event                        |                           |                            |                          |                           |                            |                          |
| Post-intubation hypotension§         | 47 (14.9)                 | 180 (27.2)                 | 30.5                     | 45 (15.7)                 | 81 (28.3)                  | 30.8                     |

Abbreviations: SD, standard derivation; PS, propensity score.

\* Defined as airway obstruction, altered mental status, and other medical indications

† With or without succinylcholine, rocuronium, or vecuronium.

‡ Defined as post-graduate years 1 or 2.

§ Systolic blood pressure of  $\leq 90$  mmHg during the 30-minute period following intubation or  $\geq 20\%$  decrease in systolic blood pressure between pre-intubation and immediately after intubation.

|| Standardized difference of  $> 10$  indicates significant imbalance of a baseline covariate.
