# Supplementary material for: Association of ketamine use with lower risks of post-intubation hypotension in hemodynamically-unstable patients in the emergency department
Source: PubMed Central journal article supplement (PMC6872717; doi:10.1038/s41598-019-53360-6), 2019-11-21

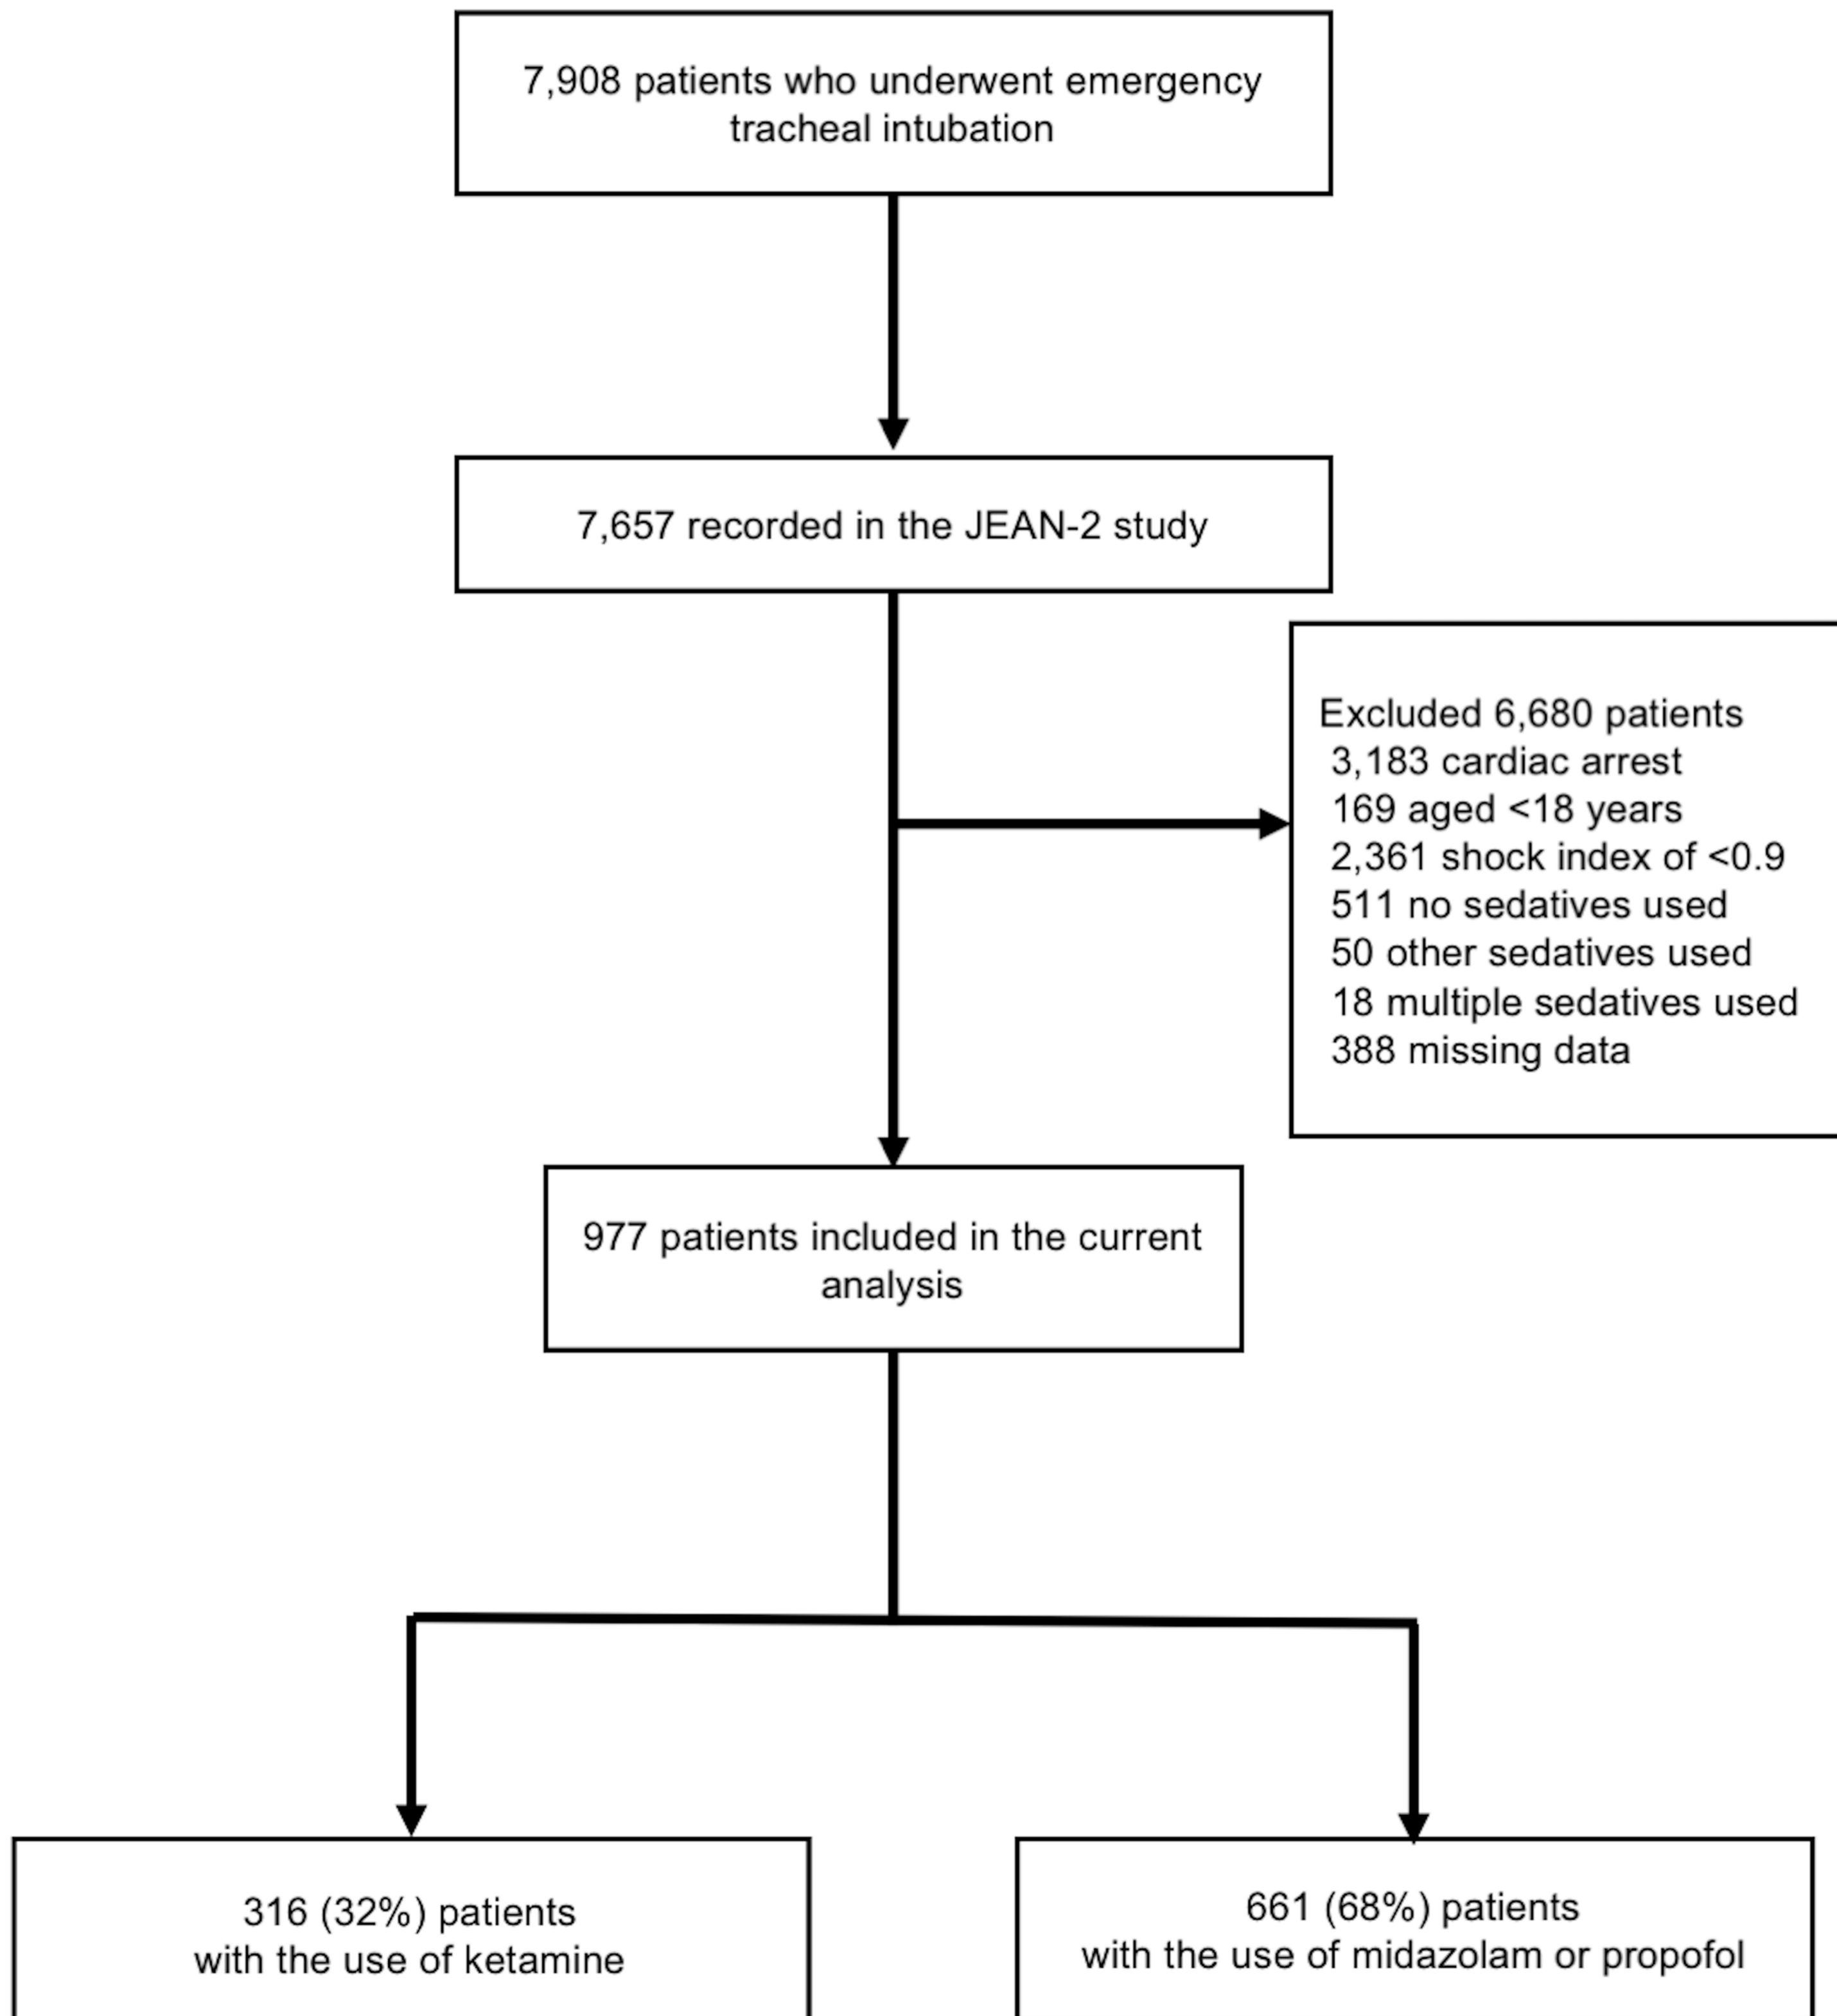

Supplement: 41598_2019_53360_MOESM2_ESM.pdf [file 41598_2019_53360_MOESM2_ESM.pdf]
